# Supplementary material for: Chemical Characterization of Different Extracts of Justicia secunda Vahl and Determination of Their Anti-Oxidant, Anti-Enzymatic, Anti-Viral, and Cytotoxic Properties
Source: MDPI journal article supplement (doi:10.3390/antiox12020509), 2023-02-17
Supplement: s1 [file s1]

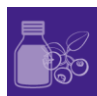

Supplementary Materials

# Chemical characterization of different extracts of *Justicia secunda* Vahl and determination of their anti-oxidant, anti-enzymatic, anti-viral, and cytotoxic properties

Łukasz Świątek<sup>1</sup>, Elwira Sieniawska<sup>2\*</sup>, Kouadio Ibrahime Sinan<sup>3</sup>, Gokhan Zengin<sup>3</sup>, Anastazja Boguszevska<sup>1</sup>, Benita Hryć<sup>4</sup>, Kouadio Bene<sup>5</sup>, Małgorzata Polz-Dacewicz<sup>1</sup>, Stefano Dall'Acqua<sup>6</sup>

<sup>1</sup>Department of Virology with SARS Laboratory, Medical University of Lublin, Chodzki 1, 20-093 Lublin, Poland

<sup>2</sup>Department of Natural Products Chemistry, Medical University of Lublin, Chodzki 1, 20-093 Lublin, Poland

<sup>3</sup>Department of Biology, Science Faculty, Selcuk University, Konya, Turkey

<sup>4</sup>MEDICOFARMA Biotech S.A., Zamenhofa 29, 20-453 Lublin, Poland

<sup>5</sup>Laboratoire de Botanique et Phytothérapie, Unité de Formation et de Recherche Sciences de la Nature, Université Nangui Abrogoua, 02 BP 801 Abidjan 02, Abidjan, Cote d'Ivoire

<sup>6</sup>Department of Pharmaceutical and Pharmacological Sciences, University of Padova, Via Marzolo 5, 35131 Padova, Italy

\* Correspondence: esieniawska@pharmacognosy.org

## Materials and Methods

### *Assays for Total Phenolic and Flavonoid Contents*

The total phenolic content was determined by employing the methods given in the literature with some modification. Sample solution (0.25 mL) was mixed with diluted Folin–Ciocalteu reagent (1 mL, 1:9, v/v) and shaken vigorously. After 3 min, Na<sub>2</sub>CO<sub>3</sub> solution (0.75 mL, 1%) was added and the sample absorbance was read at 760 nm after a 2 h incubation at room temperature. The total phenolic content was expressed as milligrams of gallic acid equivalents (mg GAE/g extract) (Uysal et al., 2017).

The total flavonoid content was determined using the AlCl<sub>3</sub> method. Briefly, sample solution (1 mL) was mixed with the same volume of aluminum trichloride (2%) in methanol. Similarly, a blank was prepared by adding sample solution (1 mL) to methanol (1 mL) without AlCl<sub>3</sub>. The sample and blank absorbances were read at 415 nm after a 10 min incubation at room temperature. The absorbance of the blank was subtracted from that of the sample. Rutin was used as a reference standard and the total flavonoid content was expressed as milligrams of rutin equivalents (mg RE/g extract) (Uysal et al., 2017).

### *Determination of Antioxidant and Enzyme Inhibitory Effects*

Antioxidant (DPPH and ABTS radical scavenging, reducing power (CUPRAC and FRAP), phosphomolybdenum and metal chelating (ferrozine method)) and enzyme inhibitory activities (cholinesterase (Eldmann's method), tyrosinase (dopachrome method),  $\alpha$ -amylase (iodine/potassium iodide method),  $\alpha$ -glucosidase (chromogenic PNPG method) and pancreatic lipase (*p*-nitrophenyl butyrate (*p*-NPB) method) were determined using the methods previously described by Uysal et al. (Uysal et al., 2017) and Grochowski et al. (Grochowski et al., 2017)

For the DPPH (1,1-diphenyl-2-picrylhydrazyl) radical scavenging assay: Sample solution was added to 4 mL of a 0.004% methanol solution of DPPH. The sample absorbance was read at 517 nm after a 30 min incubation at room temperature in the dark. DPPH radical scavenging activity was expressed as milligrams of trolox equivalents (mg TE/g extract).

For ABTS (2,2'-azino-bis(3-ethylbenzothiazoline) 6-sulfonic acid) radical scavenging assay: Briefly, ABTS<sup>+</sup> was produced directly by reacting 7 mM ABTS solution with 2.45 mM potassium persulfate and allowing the mixture to stand for 12–16 h in the dark at room temperature. Prior to beginning the assay, ABTS solution was diluted with methanol to an absorbance of  $0.700 \pm 0.02$  at 734 nm. Sample solution was added to ABTS solution (2 mL) and mixed. The sample absorbance was read at 734 nm after a 30 min incubation at room temperature. The ABTS radical scavenging activity was expressed as milligrams of trolox equivalents (mg TE/g extract).

For CUPRAC (cupric ion reducing activity) activity assay: Sample solution was added to premixed reaction mixture containing CuCl<sub>2</sub> (1 mL, 10 mM), neocuproine (1 mL, 7.5 mM) and NH<sub>4</sub>Ac buffer (1 mL, 1 M, pH 7.0). Similarly, a blank was prepared by adding sample solution (0.5 mL) to premixed reaction mixture (3 mL) without CuCl<sub>2</sub>. Then, the sample and blank absorbances were read at 450 nm after a 30 min incubation at room temperature. The absorbance of the blank was subtracted from that of the sample. CUPRAC activity was expressed as milligrams of trolox equivalents (mg TE/g extract).

For FRAP (ferric reducing antioxidant power) activity assay: Sample solution was added to premixed FRAP reagent (2 mL) containing acetate buffer (0.3 M, pH 3.6), 2,4,6-tris(2-pyridyl)-S-triazine (TPTZ) (10 mM) in 40 mM HCl and ferric chloride (20 mM) in a ratio of 10:1:1 (v/v/v). Then, the sample absorbance was read at 593 nm after a 30 min incubation at room temperature. FRAP activity was expressed as milligrams of trolox equivalents (mg TE/g extract).

For phosphomolybdenum method: Sample solution was combined with 3 mL of reagent solution (0.6 M sulfuric acid, 28 mM sodium phosphate and 4 mM ammonium molybdate). The sample absorbance was read at 695 nm after a 90 min incubation at 95 °C. The total antioxidant capacity was expressed as millimoles of trolox equivalents (mmol TE/g extract).

For metal chelating activity assay: Briefly, sample solution was added to FeCl<sub>2</sub> solution (0.05 mL, 2 mM). The reaction was initiated by the addition of 5 mM ferrozine (0.2 mL). Similarly, a blank was prepared by adding sample solution (2 mL) to FeCl<sub>2</sub> solution (0.05 mL, 2 mM) and water (0.2 mL) without ferrozine. Then, the sample and blank absorbances were read at 562 nm after 10 min incubation at room temperature. The absorbance of the blank was subtracted from that of the

sample. The metal chelating activity was expressed as milligrams of EDTA (disodium edetate) equivalents (mg EDTAE/g extract).

For Cholinesterase (ChE) inhibitory activity assay: Sample solution (was mixed with DTNB (5,5-dithio-bis(2-nitrobenzoic) acid, Sigma, St. Louis, MO, USA) (125  $\mu$ L) and AChE (acetylcholinesterase (Electric ell acetylcholinesterase, Type-VI-S, EC 3.1.1.7, Sigma)), or BChE (butyrylcholinesterase (horse serum butyrylcholinesterase, EC 3.1.1.8, Sigma)) solution (25  $\mu$ L) in Tris-HCl buffer (pH 8.0) in a 96-well microplate and incubated for 15 min at 25 °C. The reaction was then initiated with the addition of acetylthiocholine iodide (ATCI, Sigma) or butyrylthiocholine chloride (BTCL, Sigma) (25  $\mu$ L). Similarly, a blank was prepared by adding sample solution to all reaction reagents without enzyme (AChE or BChE) solution. The sample and blank absorbances were read at 405 nm after 10 min incubation at 25 °C. The absorbance of the blank was subtracted from that of the sample and the cholinesterase inhibitory activity was expressed as galanthamine equivalents (mg GALAE/g extract).

For Tyrosinase inhibitory activity assay: Sample solution was mixed with tyrosinase solution (40  $\mu$ L, Sigma) and phosphate buffer (100  $\mu$ L, pH 6.8) in a 96-well microplate and incubated for 15 min at 25 °C. The reaction was then initiated with the addition of L-DOPA (40  $\mu$ L, Sigma). Similarly, a blank was prepared by adding sample solution to all reaction reagents without enzyme (tyrosinase) solution. The sample and blank absorbances were read at 492 nm after a 10 min incubation at 25 °C. The absorbance of the blank was subtracted from that of the sample and the tyrosinase inhibitory activity was expressed as kojic acid equivalents (mg KAE/g extract).

For  $\alpha$ -amylase inhibitory activity assay: Sample solution was mixed with  $\alpha$ -amylase solution (ex-porcine pancreas, EC 3.2.1.1, Sigma) (50  $\mu$ L) in phosphate buffer (pH 6.9 with 6 mM sodium chloride) in a 96-well microplate and incubated for 10 min at 37 °C. After pre-incubation, the reaction was initiated with the addition of starch solution (50  $\mu$ L, 0.05%). Similarly, a blank was prepared by adding sample solution to all reaction reagents without enzyme ( $\alpha$ -amylase) solution. The reaction mixture was incubated 10 min at 37 °C. The reaction was then stopped with the addition of HCl (25  $\mu$ L, 1 M). This was followed by addition of the iodine-potassium iodide solution (100  $\mu$ L). The sample and blank absorbances were read at 630 nm. The absorbance of the

blank was subtracted from that of the sample and the  $\alpha$ -amylase inhibitory activity was expressed as acarbose equivalents (mmol ACE/g extract).

For  $\alpha$ -glucosidase inhibitory activity assay: Sample solution was mixed with glutathione (50  $\mu$ L),  $\alpha$ -glucosidase solution (from *Saccharomyces cerevisiae*, EC 3.2.1.20, Sigma) (50  $\mu$ L) in phosphate buffer (pH 6.8) and PNPG (4-N-trophenyl- $\alpha$ -D-glucopyranoside, Sigma) (50  $\mu$ L) in a 96-well microplate and incubated for 15 min at 37 °C. Similarly, a blank was prepared by adding sample solution to all reaction reagents without enzyme ( $\alpha$ -glucosidase) solution. The reaction was then stopped with the addition of sodium carbonate (50  $\mu$ L, 0.2 M). The sample and blank absorbances were read at 400 nm. The absorbance of the blank was subtracted from that of the sample and the  $\alpha$ -glucosidase inhibitory activity was expressed as acarbose equivalents (mmol ACE/g extract).

### *Cell line maintenance and in vitro experiments*

The cytotoxicity of *Justicia secunda* extracts was evaluated *in vitro* towards normal VERO (ECACC, No. 84113001) cells and cancer-derived cell lines – FaDu (ATCC, HTB-43, human hypopharyngeal squamous cell carcinoma), and Detroit 562 (ATCC, No. CCL-138, human pharyngeal cancer), using 3-(4,5-dimethylthiazol-2-yl)-2,5-diphenyltetrazolium bromide (MTT) based protocol.

Media used for *in vitro* culturing included Dulbecco Modified Eagle Medium (DMEM, Corning, Tewksbury, MA, USA) used for VERO cells and Modified Eagle Medium (MEM, Corning) used for pharyngeal carcinomas. Cell media used in the experiments were supplemented with antibiotics (Penicillin-Streptomycin Solution, Corning) and fetal bovine serum (FBS, Corning) – 10% (cell passaging) and 2% (cell maintenance and experiments). Phosphate buffered saline (PBS) and trypsin were bought from Corning, whereas MTT (3-(4,5-dimethylthiazol-2-yl)-2,5-diphenyltetrazolium bromide) and DMSO (dimethyl sulfoxide) from Sigma (Sigma-Aldrich, St. Louis, MO, USA). Incubation was carried out in a 5% CO<sub>2</sub> atmosphere at 37°C (CO<sub>2</sub> incubator, Panasonic Healthcare Co., Tokyo, Japan).

### *The cytotoxicity testing*

Cytotoxicity was tested using an MTT-based protocol following a previously described protocol [Świątek, 2021]. Briefly, the cells were passaged into 96-well plates (Falcon, TC-treated, Corning) and, after overnight incubation, treated with serial dilutions of extract stock solutions for 72 h. Afterwards, the media was removed, cells were washed with PBS, and 10% of MTT solution (5 mg/mL) in cell media was added, and the incubation continued for the next 4 h. Subsequently, the SDS/DMF/PBS (14% SDS, 36% DMF, 50% PBS) solvent was used (100 µL per well) to dissolve the precipitated formazan crystals, and the plates were left at 37°C overnight. Finally, the Synergy H1 Multi-Mode Microplate Reader (BioTek Instruments, Inc. Winooski, Vermont, USA) with Gen5 software (ver. 3.09.07; BioTek Instruments, Inc.) was used to measure the absorbance (540 and 620 nm).

### *Evaluation of the antiviral properties*

The antiviral activity of *Justicia secunda* extracts was tested against HHV-1 (ATCC, Cat. No. VR-260) propagated in the VERO cell line. The antiviral assays involved the influence of extracts on the formation of virus-induced cytopathic effect (CPE), the evaluation of the reduction of infectious titer using the end-point virus titration and the semi-quantitative assessment of the viral load using Real-Time PCR.

### *Evaluation of the influence on the virus-induced CPE*

The infectious titer of HHV-1 used in this study was  $5.5 \pm 0.25 \log \text{CCID}_{50}/\text{mL}$  ( $\text{CCID}_{50}$  – 50% cell culture infectious dose). Briefly, the VERO cells (monolayer) in 48-well plates (Falcon, clear flat bottom TC-treated, Corning) were treated (500 µL/well) with HSV-1 suspension (100-fold  $\text{CCID}_{50}/\text{mL}$ ) in cell media and incubated for 1 hour, leaving at least two uninfected wells as VERO cell control. Afterwards, the media were removed, monolayers washed with PBS, and the non-toxic concentrations of extracts, the highest concentration not exceeding the  $\text{CC}_{10}$  values, diluted in cell media were added. The non-infected VERO cells (cell control) and non-treated infected cells (virus control) wells were maintained in media containing 2% FBS. The incubation was conducted

until cytopathic effect (CPE) was observed (inverted microscope CKX41, Olympus Corporation, Tokyo, Japan) in virus control, usually approx. 72h. Afterwards, the plates were observed for possible inhibition of CPE by tested extracts compared to the CPE in virus control, and the results were recorded. Lastly, the plates were thrice frozen ( $-72^{\circ}\text{C}$ ) and thawed; the samples were collected and stored at  $-72^{\circ}\text{C}$  until used in the end-point virus titration assay and DNA isolation.

### *End-point dilution assay for HHV-1 titration*

Samples collected from antiviral assays were subjected to an end-point dilution assay to evaluate the HHV-1 titers. Briefly, the VERO cells (monolayer) in 96-well plates were incubated with ten-fold dilutions of samples (3 replicates) in cell media for 72 hours. Daily observation was conducted to monitor the development of CPE. After the incubation, all media were removed, and the virus infectious titer for each sample was measured using the previously described MTT method. Subsequently, the difference ( $\Delta\log$ ) of HHV-1 infectious titer ( $\log\text{CCID}_{50}/\text{mL}$ ) in the samples treated with *Justicia secunda* extracts (JS) and in the virus control (VC) from the same experiment ( $\Delta\log = \log\text{CCID}_{50}\text{VC} - \log\text{CCID}_{50}\text{JS}$ ) were calculated. The  $\Delta\log$  values were evaluated for every antiviral assay, and the results were expressed further as means of viral titer reduction. A significant antiviral activity can be reported for extracts decreasing the infectious titer by at least 3 log compared to virus control [Świątek, 2021].

### *Real-Time PCR for HHV-1 viral load*

The DNA isolation was carried out using a commercially available kit (QIAamp DNA Mini Kit, Cat#51304, QIAGEN GmbH, Hilden, Germany) following the manufacturer's instructions. The Real-Time PCR amplification was performed using SybrAdvantage qPCR Premix (Takara Bio Inc., Kusatsu, Shiga Prefecture, Japan) and primers (UL54F – 5' CGCCAAGAAAATTCATCGAG 3', UL54R – 5' ACATCTTGACCCACGCCAG 3') on the CFX96 thermal cycler (Bio-Rad Laboratories, Inc., California, USA). The amplification cycle parameters were as follows: initial activation ( $95^{\circ}\text{C}$ , 20 secs); cycling (40 repeats: denaturation ( $95^{\circ}\text{C}$ , 5 secs), annealing and synthesis ( $60^{\circ}\text{C}$ , 30 secs), fluorescence acquisition); melting curve analysis ( $65$ – $95^{\circ}\text{C}$ ). The HHV-1 viral load in the tested

---

samples was assessed in relation to virus control based on the relative quantity ( $\Delta Cq$ ) method using CFX Manager™ Dx Software (Bio-Rad Laboratories).



Table S1. Chemical characterization of the tested extracts (DCM – Dichloromethane; EA – Ethyl acetate; Methanolic; H<sub>2</sub>O – Aqueous; INF – Infusion)

| Compound no | Retention time | Molecular Formula                               | NEGATIVE ION MODE                        |                 |                                                                                     | POSITIVE ION MODE                        |                 |                     | Identification                | Extracts                    | References                 |
|-------------|----------------|-------------------------------------------------|------------------------------------------|-----------------|-------------------------------------------------------------------------------------|------------------------------------------|-----------------|---------------------|-------------------------------|-----------------------------|----------------------------|
|             |                |                                                 | PRECURSOR ION (m/z) measured<br>(Δ, ppm) | (m/z) predicted | Fragment ions (m/z)                                                                 | PRECURSOR ION (m/z) measured<br>(Δ, ppm) | (m/z) predicted | Fragment ions (m/z) |                               |                             |                            |
| 1.          | 1.692          | C <sub>5</sub> H <sub>10</sub> O <sub>6</sub>   | [M-H] <sup>-</sup><br>165.0397<br>(4.59) | 165.0405        | 165.0372; 105.0178;<br>99.0066; 96.9598;<br>87.0079; 79.9584;<br>75.0078; 71.0134   | -                                        | -               | -                   | Carboxylic acid derivative    | MeOH, H <sub>2</sub> O, INF | Fragmentation              |
| 2.          | 1.929          | C <sub>5</sub> H <sub>8</sub> O <sub>6</sub>    | [M-H] <sup>-</sup><br>163.0239<br>(5.56) | 163.0248        | 163.0223; 145.0119;<br>117.0174; 101.0228;<br>99.0066; 75.0052;<br>72.9928; 71.0121 | -                                        | -               | -                   | Carboxylic acid derivative    | H <sub>2</sub> O, INF       | Fragmentation              |
| 3.          | 1.932          | C <sub>6</sub> H <sub>10</sub> O <sub>8</sub>   | [M-H] <sup>-</sup><br>209.0294<br>(4.24) | 209.0303        | 209.0309; 191.0172;<br>133.0109; 129.0175;<br>85.0284; 75.0081;<br>72.9925; 71.0131 | -                                        | -               | -                   | Unknown                       | MeOH, INF                   | Fragmentation              |
| 4.          | 2.177          | C <sub>12</sub> H <sub>15</sub> NO <sub>6</sub> | [M-H] <sup>-</sup><br>268.0813<br>(5.06) | 268.0827        | 250.0743; 235.0481;<br>224.0575; 220.0191;<br>204.0294; 165.0093;<br>138.0201       | [M+H] <sup>+</sup><br>270.0966 (2.28)    | 270.0972        | -                   | Secundarellone B/C (racemate) | DCM                         | Theiler et al., 2014, 2017 |
|             |                |                                                 |                                          |                 |                                                                                     | [M+Na] <sup>+</sup><br>292.079 (0.59)    | 292.0792        | 246.0707; 274.0688  |                               |                             |                            |
| 5.          | 2.351          | C <sub>6</sub> H <sub>8</sub> O <sub>7</sub>    | [M-H] <sup>-</sup><br>191.0179<br>(9.51) | 191.0197        | 191.0174; 158.8439;<br>129.0173; 111.0075;<br>87.0078; 85.0282                      | [M+Na] <sup>+</sup><br>215.0161 (0.64)   | 215.0162        | -                   | Citric acid                   | MeOH, INF                   | PubChem                    |
| 6.          | 2.357          | C <sub>12</sub> H <sub>15</sub> NO <sub>5</sub> | [M-H] <sup>-</sup><br>252.0869<br>(3.34) | 252.0877        | 237.0601;<br>222.0440; 208.0209;<br>138.0196; 125.0224;                             | [2M+Na] <sup>+</sup><br>529.1798 (-1.05) | 529.1793        | 276.0863; 258.0752  | Secundarellone A isomer 1     | DCM                         | Theiler et al., 2014, 2017 |

|     |       |                                                 |                                           |          |                                                                               |                                         |          |                                                                                         |                              |                                               |                               |
|-----|-------|-------------------------------------------------|-------------------------------------------|----------|-------------------------------------------------------------------------------|-----------------------------------------|----------|-----------------------------------------------------------------------------------------|------------------------------|-----------------------------------------------|-------------------------------|
|     |       |                                                 |                                           |          |                                                                               | [M+Na] <sup>+</sup><br>276.0838 (1.75)  | 276.0842 | 258.0742                                                                                |                              |                                               |                               |
|     |       |                                                 |                                           |          |                                                                               | [M+H] <sup>+</sup><br>254.1018 (1.97)   | 254.1023 | 236.0942; 208.0962;<br>176.0688; 170.0774;<br>166.0475; 155.0557;<br>134.0587; 116.0488 |                              |                                               |                               |
| 7.  | 6.612 | C <sub>12</sub> H <sub>15</sub> NO <sub>5</sub> | [M-H] <sup>-</sup><br>252.0867<br>(4.13)  | 252.0877 | 237.0584; 222.0460;<br>138.0177                                               | [2M+Na] <sup>+</sup><br>529.1790 (0.53) | 529.1793 | 276.0856; 258.0805                                                                      | Secundarellone A isomer<br>2 | DCM,<br>EA,<br>MeOH,<br>H <sub>2</sub> O, INF | Theiler et al.,<br>2014, 2017 |
|     |       |                                                 |                                           |          |                                                                               | [M+Na] <sup>+</sup><br>276.0837 (2.15)  | 276.0842 | 258.0704                                                                                |                              |                                               |                               |
|     |       |                                                 |                                           |          |                                                                               | [M+H] <sup>+</sup><br>254.1012 (4.34)   | 254.1023 | 236.0922; 208.0950;<br>176.0701; 170.0813;<br>166.0474; 155.0603;<br>134.0598; 116.0512 |                              |                                               |                               |
| 8.  | 7.865 | C <sub>10</sub> H <sub>11</sub> NO <sub>6</sub> | [M-H] <sup>-</sup><br>240.0510<br>(1.50)  | 240.0514 | 222.0367; 178.0476;<br>166.0473; 151.0364;<br>138.0166; 123.0049;<br>116.0321 | -                                       | -        | -                                                                                       | Unknown                      | INF                                           | Fragmentation                 |
| 9.  | 8.404 | C <sub>22</sub> H <sub>12</sub> O <sub>5</sub>  | [M-H] <sup>-</sup><br>355.0638<br>(-7.31) | 355.0612 | 209.0269; 191.0169;<br>163.0408; 147.0276;<br>129.0167; 85.0288;              | -                                       | -        | -                                                                                       | Lignan derivative            | INF                                           | Fragmentation                 |
| 10. | 9.003 | C <sub>15</sub> H <sub>20</sub> O <sub>10</sub> | [M-H] <sup>-</sup><br>359.0977<br>(1.86)  | 359.0984 | 197.0423; 182.0183;<br>153.0516; 138.0286                                     | [M+Na] <sup>+</sup><br>383.0958 (1.86)  | 359.0984 | 221.0320; 185.0465;<br>181.0473; 174.0479;<br>139.0692                                  | Syringic acid glucoside      | H <sub>2</sub> O, INF                         | PubChem                       |

|     |        |                                                |                                           |          |                                                                 |                                        |          |                                                                               |                                                                                                        |                                |                          |
|-----|--------|------------------------------------------------|-------------------------------------------|----------|-----------------------------------------------------------------|----------------------------------------|----------|-------------------------------------------------------------------------------|--------------------------------------------------------------------------------------------------------|--------------------------------|--------------------------|
| 11. | 9.303  | C <sub>7</sub> H <sub>12</sub> O <sub>5</sub>  | [M-H] <sup>-</sup><br>175.0605<br>(3.96)  | 175.0612 | 175.0603; 157.049;<br>131.0701; 115.0397;<br>113.0599; 85.0654; | [M+Na] <sup>+</sup><br>199.0569 (4.51) | 199.0577 | -                                                                             | Carboxylic acid<br>derivative                                                                          | H <sub>2</sub> O, INF          | Fragmentation            |
| 12. | 10.262 | C <sub>13</sub> H <sub>16</sub> O <sub>8</sub> | [M-H] <sup>-</sup><br>299.0772<br>(0.14)  | 299.0772 | 255.0876; 138.0252;<br>137.0225; 93.0337;                       | [M+Na] <sup>+</sup><br>323.0735 (0.80) | 323.0737 | 203.0489; 193.0445;<br>185.0399; 177.0549;<br>161.0197; 145.0273;<br>117.0393 | Salicylic acid glucoside                                                                               | MeOH,<br>INF                   | PubChem<br>Fragmentation |
| 13. | 10.741 | C <sub>13</sub> H <sub>16</sub> O <sub>9</sub> | [M-H] <sup>-</sup><br>315.0725<br>(-1.09) | 315.0722 | 153.0180; 135.0091;<br>109.0285; 85.0271                        | -                                      | -        | -                                                                             | Dihydroxybenzoic acid<br><i>O</i> -glucoside (2,4-<br>dihydroxybenzoic acid<br><i>O</i> -glucoside)    | INF                            | Fragmentation            |
| 14. | 11.221 | C <sub>12</sub> H <sub>14</sub> O <sub>8</sub> | [M-H] <sup>-</sup><br>285.0618<br>(-0.73) | 285.0616 | 153.0159; 152.0094;<br>108.0192; 81.0336                        | -                                      | -        | -                                                                             | Dihydroxybenzoic acid<br><i>O</i> -pentoside                                                           | MeOH,<br>H <sub>2</sub> O, INF | Fragmentation            |
| 15. | 11.341 | C <sub>22</sub> H <sub>12</sub> O <sub>5</sub> | [M-H] <sup>-</sup><br>355.0628<br>(-4.50) | 355.0612 | 209.0260; 191.0162;<br>147.0261; 129.0179;<br>85.0276           | -                                      | -        | -                                                                             | Lignan derivative<br>(10-(1,3-benzodioxol-5-<br>yl)-5h-benzo[c]furo[3,2-<br>g]chromen-5-one<br>isomer) | INF                            | Fragmentation            |
| 16. | 11.885 | C <sub>13</sub> H <sub>16</sub> O <sub>9</sub> | [M-H] <sup>-</sup><br>315.0738<br>(-5.20) | 315.0722 | 154.0124; 101.0231;<br>96.9594; 79.9558                         | -                                      | -        | -                                                                             | Unknown                                                                                                | MeOH,<br>H <sub>2</sub> O, INF | Fragmentation            |
| 17. | 12.300 | C <sub>22</sub> H <sub>12</sub> O <sub>5</sub> | [M-H] <sup>-</sup><br>355.0617<br>(-1.41) | 355.0612 | 209.0262; 191.0157;<br>147.0271; 129.0156;<br>111.0084; 85.0276 | -                                      | -        | -                                                                             | Lignan derivative<br>(10-(1,3-benzodioxol-5-<br>yl)-5H-benzo[c]furo[3,2-<br>g]chromen-5-one<br>isomer) | INF                            | Fragmentation            |
| 18. | 12.480 | C <sub>15</sub> H <sub>18</sub> O <sub>9</sub> | [M-H] <sup>-</sup><br>341.0849<br>(8.49)  | 341.0878 | 179.0309; 135.0427                                              | -                                      | -        | -                                                                             | Caffeoyl glucoside                                                                                     | MeOH,<br>INF                   | Fragmentation<br>PubChem |

|     |        |                                                 |                                              |          |                                                                                                   |                                        |          |                                                        |                                                                                                        |                             |                          |
|-----|--------|-------------------------------------------------|----------------------------------------------|----------|---------------------------------------------------------------------------------------------------|----------------------------------------|----------|--------------------------------------------------------|--------------------------------------------------------------------------------------------------------|-----------------------------|--------------------------|
| 19. | 12.899 | C <sub>18</sub> H <sub>28</sub> O <sub>9</sub>  | [M-H] <sup>-</sup><br>387.1656<br>(1.17)     | 387.1661 | 163.1143; 119.0334;<br>113.0289; 101.0234;<br>89.0229; 71.0132                                    | -                                      | -        | -                                                      | Hydroxyjasmonic acid<br>glucoside                                                                      | MeOH,<br>INF                | Fragmentation            |
| 20. | 13.136 | C <sub>19</sub> H <sub>30</sub> O <sub>8</sub>  | [M+COOH] <sup>-</sup><br>431.1940<br>(-4.48) | 431.1923 | 385.1874 ([M-H] <sup>-</sup> );<br>223.1326; 161.0431;<br>153.0914                                | [M+Na] <sup>+</sup><br>409.1825 (2.04) | 409.1833 | 248.0673; 203.0502;<br>185.0387; 177.0793              | Roseoside                                                                                              | DCM,<br>EA,<br>MeOH,<br>INF | Silva et al.,<br>2022    |
| 21. | 13.438 | C <sub>20</sub> H <sub>26</sub> O <sub>12</sub> | [M-H] <sup>-</sup><br>457.1330<br>(4.69)     | 457.1351 | 205.0527; 163.0416;<br>119.0515; 101.0241;<br>73.0328; 71.0145                                    | [M+Na] <sup>+</sup><br>481.1297 (4.25) | 481.1316 | 349.0878; 317.0860;<br>187.0360; 185.0454;<br>147.0501 | Hydroxycinnamic acid O-<br>pentoside-glucoside                                                         | MeOH,<br>INF                | PubChem                  |
| 22. | 14.997 | C <sub>22</sub> H <sub>12</sub> O <sub>5</sub>  | [M-H] <sup>-</sup><br>355.0631<br>(-5.34)    | 355.0612 | 209.0275; 191.0167;<br>163.0338; 147.0276;<br>129.0165; 111.0065;<br>85.0283                      | -                                      | -        | -                                                      | Lignan derivative<br>(10-(1,3-benzodioxol-5-<br>yl)-5H-benzo[c]furo[3,2-<br>g]chromen-5-one<br>isomer) | INF                         | Fragmentation            |
| 23. | 15.236 | C <sub>17</sub> H <sub>22</sub> O <sub>13</sub> | [M-H] <sup>-</sup><br>433.0972<br>(3.60)     | 433.0988 | 301.0528; 169.0087;<br>168.0036; 150.9996;<br>149.9920; 125.0219;<br>124.0142                     | -                                      | -        | -                                                      | Trihydroxybenzoic acid<br>O-dipentoside (Gallic<br>acid O-dipentoside)                                 | INF                         | PubChem<br>Fragmentation |
| 24. | 15.476 | C <sub>12</sub> H <sub>14</sub> O <sub>9</sub>  | [M-H] <sup>-</sup><br>301.0549<br>(5.32)     | 301.0565 | 169.0071; 168.0056;<br>151.0006; 149.9959;<br>125.0220; 124.0163                                  | -                                      | -        | -                                                      | Trihydroxybenzoic acid<br>O-pentoside (Gallic acid<br>O-pentoside)                                     | MeOH,<br>INF                | PubChem<br>Fragmentation |
| 25. | 16.909 | C <sub>19</sub> H <sub>32</sub> O <sub>8</sub>  | [M+COOH] <sup>-</sup><br>433.2084<br>(-1.23) | 433.2079 | 387.2052 ([M-H] <sup>-</sup> );<br>316.1571; 119.0445;<br>102.0273; 101.0238;<br>89.0229; 71.0110 | [M+Na] <sup>+</sup><br>411.1988 (0.36) | 411.1989 | 203.0491; 189.0954;<br>177.0538                        | Cyclohexanone<br>derivative glucoside<br>(Dihydroroseoside)                                            | DCM,<br>EA,<br>MeOH,<br>INF | Fragmentation            |
| 26. | 18.538 | C <sub>14</sub> H <sub>14</sub> O <sub>8</sub>  | [M-H] <sup>-</sup><br>309.0611<br>(1.58)     | 309.0616 | 179.0311; 161.0223;<br>145.0115; 135.0435                                                         | -                                      | -        | -                                                      | Caffeic acid derivative                                                                                | MeOH                        | Fragmentation            |
| 27. | 20.091 | C <sub>9</sub> H <sub>8</sub> O <sub>3</sub>    | [M-H] <sup>-</sup><br>163.0406<br>(-3.24)    | 163.0401 | 119.0513; 117.0352;<br>93.0355; 91.0568                                                           | -                                      | -        | -                                                      | Hydroxycinnamic acid                                                                                   | INF                         | PubChem<br>Fragmentation |

|     |        |                                                 |                                             |          |                                                                                                   |                                           |          |                                                                                        |                                                                                                                   |                             |                       |
|-----|--------|-------------------------------------------------|---------------------------------------------|----------|---------------------------------------------------------------------------------------------------|-------------------------------------------|----------|----------------------------------------------------------------------------------------|-------------------------------------------------------------------------------------------------------------------|-----------------------------|-----------------------|
| 28. | 20.337 | C <sub>11</sub> H <sub>16</sub> O <sub>3</sub>  | -                                           | -        | -                                                                                                 | [M+H] <sup>+</sup><br>197.1170 (1.13)     | 197.1172 | 197.1187; 179.1075;<br>161.0961; 135.1173;<br>133.1019; 107.0867;<br>105.0695; 91.0541 | Unknown                                                                                                           | DCM,<br>EA,<br>MeOH,<br>INF | Fragmentation         |
|     |        |                                                 |                                             |          |                                                                                                   | [M+Na] <sup>+</sup><br>219.0984 (3.9)     | 219.0992 | 165.0694; 116.0479;<br>89.0389                                                         |                                                                                                                   |                             |                       |
| 29. | 21.534 | C <sub>33</sub> H <sub>40</sub> O <sub>20</sub> | [M-H] <sup>-</sup><br>755.2011<br>(3.86)    | 755.2040 | 593.1425; 285.0338                                                                                | [M+H] <sup>+</sup><br>757.2180 (0.75)     | 757.2186 | 611.1582; 449.1018;<br>433.1066; 287.0524                                              | Luteolin 7-O-[β-<br>glucopyranosyl-(1→2)-<br>β-rhamnosyl-(1→6)] β-<br>glucopyranoside                             | EA,<br>MeOH,<br>INF         | Koffi et al.,<br>2013 |
| 30. | 22.967 | C <sub>33</sub> H <sub>40</sub> O <sub>19</sub> | [M-H] <sup>-</sup><br>739.2066<br>(3.38)    | 739.2091 | 593.1550; 561.1121;<br>329.0920; 285.0331;<br>269.0419                                            | [M+H] <sup>+</sup><br>741.2235 (0.21)     | 741.2237 | 595.1629; 433.1081;<br>287.0522; 271.0574;<br>147.0603; 85.0304                        | Trihydroxyflavone di-O-<br>hexoside-O-rhamnoside<br>(apigenin 7-O-glucoside-<br>glucoside-rhamnoside)             | MeOH,<br>INF                | Fragmentation         |
| 31. | 23.202 | C <sub>21</sub> H <sub>36</sub> O <sub>8</sub>  | [M+COOH] <sup>-</sup><br>461.2383<br>(2.21) | 461.2392 | 415.2334 ([M-H] <sup>-</sup> );<br>387.0261; 174.9569;<br>119.0341; 101.0204;<br>89.0244; 71.0157 | [M+Na] <sup>+</sup><br>439.2293 (2.26)    | 439.2302 | 421.2243; 369.1954;<br>118.0820                                                        | Decalin derivative                                                                                                | DCM, EA,<br>MeOH,<br>INF    | Fragmentation         |
| 32. | 23.207 | C <sub>34</sub> H <sub>42</sub> O <sub>20</sub> | [M-H] <sup>-</sup><br>769.2216<br>(-2.51)   | 769.2197 | 299.0541; 284.0279                                                                                | [M+H] <sup>+</sup><br>771.2346<br>(-0.49) | 771.2342 | -                                                                                      | Trihydroxymethoxyflavo<br>ne di-O-hexoside-O-<br>rhamnoside (diosmetin<br>7-O-glucoside-<br>rhamnoside-glucoside) | MeOH,<br>INF                | Fragmentation         |
| 33. | 23.327 | C <sub>27</sub> H <sub>30</sub> O <sub>15</sub> | [M-H] <sup>-</sup><br>593.1540<br>(-4.72)   | 593.1512 | 285.0356                                                                                          | [M+H] <sup>+</sup><br>595.1649 (1.43)     | 595.1657 | 449.1044; 287.0512                                                                     | Tetrahydroxyflavone O-<br>hexoside-O-rhamnoside<br>(luteolin-7-O-rutinoside)                                      | EA,<br>MeOH,<br>INF         | KOFFI et al.,<br>2020 |
| 34. | 23.392 | C <sub>27</sub> H <sub>30</sub> O <sub>16</sub> | [M-H] <sup>-</sup><br>609.1490<br>(-4.74)   | 609.1461 | 300.0275; 301.0338;<br>271.0263; 179.0003;<br>151.0020                                            | -                                         | -        | -                                                                                      | Rutin                                                                                                             | MeOH                        | PubChem               |

|     |        |                                                 |                                              |          |                                                                              |                                           |          |                                                                              |                                                                                                                  |                          |                                               |
|-----|--------|-------------------------------------------------|----------------------------------------------|----------|------------------------------------------------------------------------------|-------------------------------------------|----------|------------------------------------------------------------------------------|------------------------------------------------------------------------------------------------------------------|--------------------------|-----------------------------------------------|
| 35. | 23.742 | C <sub>19</sub> H <sub>32</sub> O <sub>7</sub>  | [M+COOH] <sup>-</sup><br>417.2129<br>(0.29)  | 417.2130 | 371.2052 ([M-H] <sup>-</sup> );<br>101.0215; 71.0125                         | [M+Na] <sup>+</sup><br>395.2026 (3.83)    | 395.2040 | 305.1568; 233.1640;<br>182.1845; 118.0796                                    | Cyclohexanone<br>derivative glucoside (9-<br>Hydroxy-7-<br>megastigmen-3-one<br>glucoside)                       | DCM, EA,<br>MeOH,<br>INF | Fragmentation                                 |
| 36. | 24.111 | C <sub>26</sub> H <sub>34</sub> O <sub>10</sub> | [M-H] <sup>-</sup><br>505.2076<br>(0.63)     | 505.2079 | 265.0505; 137.0256;<br>93.0353                                               | -                                         | -        | -                                                                            | Lignan derivative                                                                                                | MeOH                     | Fragmentation;<br>Corrêa &<br>Alcântara, 2012 |
| 37. | 24.161 | C <sub>19</sub> H <sub>28</sub> O <sub>7</sub>  | [M+COOH] <sup>-</sup><br>413.1832<br>(-4.06) | 413.1817 | 367.1755 ([M-H] <sup>-</sup> );<br>327.8006; 89.0216;<br>81.0287; 73.0246    | [M+H] <sup>+</sup><br>369.1901 (1.85)     | 369.1908 | 207.1387; 189.1244;<br>161.1325; 119.0856;<br>105.0706                       | Cyclohexanone<br>derivative                                                                                      | DCM, EA,<br>MeOH         | Fragmentation                                 |
|     |        |                                                 |                                              |          |                                                                              | [M+Na] <sup>+</sup><br>391.173 (-0.75)    | 391.1727 | 218.1428; 189.4323;<br>175.1096; 177.0396                                    |                                                                                                                  |                          |                                               |
| 38. | 24.586 | C <sub>37</sub> H <sub>38</sub> O <sub>19</sub> | [M-H] <sup>-</sup><br>785.1898<br>(4.65)     | 785.1935 | 649.1328; 593.1463;<br>285.0311; 233.0256;<br>191.0156; 135.0216;<br>72.9927 | [M+H] <sup>+</sup><br>787.2051 (3.70)     | 787.2080 | 641.1448; 449.1058;<br>287.0611; 175.0238;<br>127.0404; 71.0524              | Tetrahydroxyflavone O-<br>hexoside-O-rhamnoside<br>derivative (luteolin O-<br>hydroxyferuloyl -O-<br>rutinoside) | INF                      | Fragmentation                                 |
| 39. | 25.126 | C <sub>21</sub> H <sub>38</sub> O <sub>8</sub>  | [M+COOH] <sup>-</sup><br>463.2536<br>(3.04)  | 463.2549 | 417.2490 ([M-H] <sup>-</sup> );<br>280.0896; 182.0400;<br>161.0467; 89.0269  | [M+Na] <sup>+</sup><br>441.2449 (2.37)    | 441.2459 | 263.1970; 203.0504                                                           | Decalin glucoside<br>derivative<br>(Ophiopogonoside A<br>isomer)                                                 | EA,<br>MeOH,<br>INF      | Fragmentation                                 |
| 40. | 25.370 | C <sub>26</sub> H <sub>28</sub> O <sub>15</sub> | [M-H] <sup>-</sup><br>579.1353<br>(0.42)     | 579.1355 | 417.0821; 399.0743;<br>285.0399                                              | [M+H] <sup>+</sup><br>581.1494 (1.20)     | 581.1501 | 419.0937; 287.0529                                                           | Tetrahydroxyflavone O-<br>pentoside-hexoside;<br>(graveobioside A =<br>luteolin 7-O-(2-<br>apiosyl)glucoside)    | EA,<br>MeOH,<br>INF      | Fragmentation                                 |
| 41. | 26.019 | C <sub>13</sub> H <sub>15</sub> NO <sub>3</sub> | [M-H] <sup>-</sup><br>232.0985<br>(-2.5)     | 232.0979 | 217.0733; 188.0356;<br>160.0403; 132.0476                                    | [M+H] <sup>+</sup><br>234.1133<br>(-3.56) | 234.1125 | 206.1150; 195.9082;<br>176.0706; 174.0909;<br>146.0957; 117.0605;<br>91.0520 | Unknown                                                                                                          | DCM                      | Fragmentation                                 |

|     |        |                                                 |                                              |          |                                                                                                   |                                           |          |                                                                              |                                                                                                  |                          |                       |
|-----|--------|-------------------------------------------------|----------------------------------------------|----------|---------------------------------------------------------------------------------------------------|-------------------------------------------|----------|------------------------------------------------------------------------------|--------------------------------------------------------------------------------------------------|--------------------------|-----------------------|
|     |        |                                                 |                                              |          |                                                                                                   | [M+Na] <sup>+</sup><br>256.0931 (5.64)    | 256.0944 | 239.1218; 215.9169;<br>187.1256; 183.1135;<br>135.1169; 122.0972;<br>84.9538 |                                                                                                  |                          |                       |
| 42. | 26.444 | C <sub>25</sub> H <sub>26</sub> O <sub>14</sub> | [M-H] <sup>-</sup><br>549.1223<br>(4.87)     | 549.1250 | 417.0759; 327.0450;<br>285.0363                                                                   | [M+H] <sup>+</sup><br>551.1414<br>(-3.40) | 551.1395 | 419.0976; 287.0548                                                           | Luteolin 7-O-[β-<br>apiofuranosyl-(1→2)]-β-<br>xylopyranoside                                    | EA,<br>MeOH,<br>INF      | Koffi et al.,<br>2013 |
| 43. | 26.499 | C <sub>19</sub> H <sub>34</sub> O <sub>10</sub> | [M+COOH] <sup>-</sup><br>467.2148<br>(-3.32) | 467.2134 | 421.2070 ([M-H] <sup>-</sup> );<br>289.1654; 161.0433;<br>113.0234; 101.0222;<br>85.0284; 71.0145 | [M+Na] <sup>+</sup><br>445.2044 (0.04)    | 445.2044 | 333.0807; 137.0718;<br>105.0680                                              | Cyclohexanone<br>derivative glucoside                                                            | DCM, EA,<br>MeOH,<br>INF | Fragmentation         |
| 44. | 26.803 | C <sub>26</sub> H <sub>28</sub> O <sub>14</sub> | [M-H] <sup>-</sup><br>563.1407<br>(-0.13)    | 563.1406 | 417.0812; 285.0373                                                                                | [M+H] <sup>+</sup><br>565.1564<br>(-2.16) | 565.1552 | 419.0955; 287.0566                                                           | Tetrahydroxyflavone O-<br>pentoside-O-<br>rhamnoside (luteolin O-<br>pentoside-O-<br>rhamnoside) | EA,<br>MeOH,<br>INF      | Fragmentation         |
| 45. | 27.098 | C <sub>17</sub> H <sub>30</sub> O <sub>7</sub>  | [M+COOH] <sup>-</sup><br>391.1984<br>(-3.02) | 391.1974 | 345.1893 ([M-H] <sup>-</sup> );<br>278.9318; 161.0452;<br>101.0271; 89.0231;<br>85.0277; 71.0119  | [M+H] <sup>+</sup><br>369.1877 (1.95)     | 369.1884 | 201.0293;<br>175.0539; 77.0391                                               | Unknown                                                                                          | DCM, EA,<br>MeOH,<br>INF | Fragmentation         |
| 46. | 27.517 | C <sub>21</sub> H <sub>38</sub> O <sub>8</sub>  | [M+COOH] <sup>-</sup><br>463.2552<br>(-0.79) | 463.2549 | 417.2479 ([M-H] <sup>-</sup> );<br>161.0444; 113.0221;<br>119.0486; 101.0227;<br>71.0140          | [M+Na] <sup>+</sup><br>441.2432 (6.43)    | 441.2459 | 295.0154; 280.216;<br>163.0611; 109.0350;<br>85.0328; 73.0276                | Decalin glucoside<br>derivative<br>(Ophiopogonoside A<br>isomer)                                 | DCM, EA,<br>MeOH,<br>INF | Fragmentation         |
| 47. | 27.640 | C <sub>19</sub> H <sub>36</sub> O <sub>10</sub> | [M+COOH] <sup>-</sup><br>469.2285<br>(1.3)   | 469.2291 | 423.2212 ([M-H] <sup>-</sup> );<br>291.1795; 161.0438;<br>113.0230; 101.0232;<br>71.0147          | [M+Na] <sup>+</sup><br>447.2195 (1.34)    | 447.2201 | 315.1726; 275.0702;<br>167.1365; 136.0664                                    | Rhodiocytanose                                                                                   | DCM, EA,<br>MeOH,        | Fragmentation         |

|     |        |                                                 |                                           |          |                                                                  |                                           |          |                                           |                                                                                                                              |                                       |                          |
|-----|--------|-------------------------------------------------|-------------------------------------------|----------|------------------------------------------------------------------|-------------------------------------------|----------|-------------------------------------------|------------------------------------------------------------------------------------------------------------------------------|---------------------------------------|--------------------------|
| 48. | 28.007 | C <sub>27</sub> H <sub>28</sub> O <sub>15</sub> | [M-H] <sup>-</sup><br>591.1363<br>(-1.28) | 591.1355 | 549.1283; 531.1164;<br>285.0412                                  | [M+H] <sup>+</sup><br>593.1533<br>(-5.41) | 591.1355 | 419.1091; 287.0566;<br>175.0597           | Tetrahydroxyflavone O-<br>pentoside-O-<br>acetylpentoside<br>(luteolin O-<br>apiofuranosyl -O-<br>acetylapiofuranosyl)       | MeOH                                  | Fragmentation            |
| 49. | 28.301 | C <sub>25</sub> H <sub>26</sub> O <sub>13</sub> | [M-H] <sup>-</sup><br>533.1277<br>(4.43)  | 533.1301 | 269.0473; 181.0546                                               | [M+H] <sup>+</sup><br>535.1466<br>(-3.71) | 535.1446 | 403.1044; 271.0595;<br>153.0127; 133.0455 | Trihydroxyflavone di-O-<br>pentoside (apigenin di-<br>O-pentoside)                                                           | MeOH,<br>INF                          | Fragmentation            |
| 50. | 28.481 | C <sub>26</sub> H <sub>28</sub> O <sub>14</sub> | [M-H] <sup>-</sup><br>563.1397<br>(1.65)  | 563.1406 | 431.0857; 299.0514;<br>284.0289                                  | [M+H] <sup>+</sup><br>565.1569<br>(-3.05) | 565.1552 | 433.1121; 301.0701;<br>286.0508           | Trihydroxymethoxyflavo<br>ne di-O-pentoside<br>(diosmetin 7-O-<br>apiofuranosyl-<br>xylopyranoside)                          | EA,<br>MeOH,<br>INF                   | Fragmentation            |
| 51. | 28.901 | C <sub>27</sub> H <sub>30</sub> O <sub>14</sub> | [M-H] <sup>-</sup><br>577.1524<br>(6.71)  | 577.1563 | 445.0708; 299.0533;<br>284.0277; 255.0273;<br>232.0934           | [M+H] <sup>+</sup><br>579.1715<br>(-1.16) | 579.1708 | 433.1186; 301.0749;<br>286.0437           | Trihydroxymethoxyflavo<br>ne O-pentoside O-<br>rhamnoside (diosmetin<br>O-apiofuranosyl- O-<br>rhamnoside)                   | EA,<br>MeOH,<br>H <sub>2</sub> O, INF | Fragmentation            |
| 52. | 30.757 | C <sub>28</sub> H <sub>30</sub> O <sub>15</sub> | [M-H] <sup>-</sup><br>605.1506<br>(0.98)  | 605.1512 | 563.1392; 545.1310;<br>530.1057; 299.0541;<br>284.0309; 255.0278 | [M+H] <sup>+</sup><br>607.1639 (3.05)     | 607.1657 | 433.1083; 301.0715;<br>286.0485; 97.0312  | Trihydroxymethoxyflavo<br>ne O-pentoside-O-<br>acetylpentoside<br>(diosmetin O-<br>apiofuranosyl -O-<br>acetylapiofuranosyl) | EA,<br>MeOH                           | Fragmentation            |
|     |        |                                                 |                                           |          |                                                                  | [M+Na] <sup>+</sup><br>629.1460 (2.79)    | 629.1477 | -                                         |                                                                                                                              |                                       |                          |
| 53. | 31.238 | C <sub>15</sub> H <sub>10</sub> O <sub>6</sub>  | [M-H] <sup>-</sup><br>285.0405<br>(-0.13) | 285.0405 | 175.0377; 151.0046;<br>149.0251; 133.0293;<br>107.0120           | [M+H] <sup>+</sup><br>287.0555<br>(-1.70) | 287.0550 | -                                         | Luteolin                                                                                                                     | MeOH,<br>INF                          | Fragmentation<br>PubChem |



|     |        |                                                 |                                           |          |                                                                               |                                            |          |                                                                              |                                                                                                            |                                            |                          |
|-----|--------|-------------------------------------------------|-------------------------------------------|----------|-------------------------------------------------------------------------------|--------------------------------------------|----------|------------------------------------------------------------------------------|------------------------------------------------------------------------------------------------------------|--------------------------------------------|--------------------------|
| 54. | 32.137 | C <sub>31</sub> H <sub>28</sub> O <sub>14</sub> | [M-H] <sup>-</sup><br>623.1361<br>(7.26)  | 623.1406 | 431.1076; 323.0640;<br>299.0628; 233.0346;<br>135.0361; 191.0197;<br>72.9946  | [M+H] <sup>+</sup><br>625.1434<br>(-5.57)  | 625.1399 | -                                                                            | Trihydroxymethoxyflavone<br>O-pentoside O-hydroxyferuloyl<br>(diosmetin O-apiofuranosyl O-hydroxyferuloyl) | INF                                        | Fragmentation            |
| 55. | 32.317 | C <sub>18</sub> H <sub>32</sub> O <sub>5</sub>  | [M-H] <sup>-</sup><br>327.2175<br>(0.60)  | 327.2177 | 229.1431; 211.1366;<br>183.1417; 171.1041;<br>97.0630; 85.0299                | [M+Na] <sup>+</sup><br>351.2158<br>(-4.89) | 351.2142 | 351.2185; 236.1367;<br>195.1064; 179.0860;<br>166.0818; 83.0979              | Fatty acid                                                                                                 | DCM, EA,<br>MeOH,<br>H <sub>2</sub> O, INF | Fragmentation            |
| 56. | 32.742 | C <sub>11</sub> H <sub>16</sub> O <sub>2</sub>  | -                                         | -        | -                                                                             | [M+H] <sup>+</sup><br>181.1217 (3.37)      | 181.1223 | 163.1106; 135.1161;<br>107.0843; 91.0547;<br>93.0708; 79.0547;<br>77.0389    | Unknown                                                                                                    | DCM, EA,<br>MeOH                           | Fragmentation            |
|     |        |                                                 |                                           |          |                                                                               | [M+Na] <sup>+</sup><br>203.1035 (4.17)     | 203.1043 | 147.0429; 131.0840;<br>129.0665; 93.0585;<br>91.0610                         |                                                                                                            |                                            |                          |
| 57. | 33.993 | C <sub>18</sub> H <sub>34</sub> O <sub>5</sub>  | [M-H] <sup>-</sup><br>329.2340<br>(-1.98) | 329.2333 | 229.1439; 211.1356;<br>183.1394; 171.1033;<br>139.1133; 127.1121;<br>99.0812  | [M+Na] <sup>+</sup><br>353.2297 (0.44)     | 353.2298 | 353.2252; 271.1220;<br>190.0905; 160.0732;<br>120.0815; 118.0648;<br>91.0544 | Fatty acid                                                                                                 | DCM, EA,<br>MeOH,<br>H <sub>2</sub> O, INF | Fragmentation            |
| 58. | 34.414 | C <sub>16</sub> H <sub>12</sub> O <sub>6</sub>  | [M-H] <sup>-</sup><br>299.0565<br>(-1.29) | 299.0561 | 284.0325; 256.0371;<br>228.0417; 227.0306;<br>151.0019; 132.0170;<br>107.0133 | [M+H] <sup>+</sup><br>301.0699 (2.55)      | 301.0707 | -                                                                            | Trihydroxymethoxyflavone<br>(diosmetin)                                                                    | EA                                         | Fragmentation<br>PubChem |

## Supplementary material references

- Grochowski, D. M.; Uysal, S.; Aktumsek, A.; Granica, S.; Zengin, G.; Ceylan, R.; Locatelli, M., & Tomczyk, M. (2017). In vitro enzyme inhibitory properties, antioxidant activities, and phytochemical profile of *Potentilla thuringiaca*. *Phytochemistry Letters*, 20, 365-372. <https://doi.org/10.1016/j.phytol.2017.03.005>
- Świątek, Ł.; Sieniawska, E.; Sinan, K.I.; Maciejewska-Turska, M.; Boguszevska, A.; Polz-Dacewicz, M.; Senkardes, I.; Guler, G.O.; Bibi Sadeer, N.; Mahomoodally, M.F.; Zengin, G. LC-ESI-QTOF-MS/MS Analysis, Cytotoxic, Antiviral, Antioxidant, and Enzyme Inhibitory Properties of Four Extracts of *Geranium pyrenaicum* Burm. f.: A Good Gift from the Natural Treasure. *Int. J. Mol. Sci.* 2021, 22, 7621. <https://doi.org/10.3390/ijms22147621>
- Uysal, S.; Zengin, G.; Locatelli, M.; Bahadori, M. B.; Mocan, A.; Bellagamba, G.; De Luca, E.; Mollica, A., & Aktumsek, A. (2017). Cytotoxic and Enzyme Inhibitory Potential of Two *Potentilla* species (*P. speciosa* L. and *P. reptans* Willd.) and Their Chemical Composition. *Frontiers in Pharmacology*, 8. <https://doi.org/10.3389/fphar.2017.00290>
- Theiler, B. A.; Revoltella, S.; Zehl, M.; Dangl, C.; Caisa, L. O. E.; König, J.; Winkler, J.; Urban, E.; Glasl, S., Secundarellone A, B, and C from the leaves of *Justicia secunda* Vahl. *Phytochemistry Letters* 2014, 10, cxxix-cxxxii.
- e Silva, J. P.; Pereira, L. C.; Abreu, L. S.; Lins, F. S.; de Souza, T. A.; do Espírito-Santo, R. F.; Barros, R. P.; Villarreal, C. F.; de Melo, J. I.; Scotti, M. T., Targeted Isolation of Anti-inflammatory Lignans from *Justicia aequilabris* by Molecular Networking Approach. *Journal of Natural Products* 2022, 85, (9), 2184-2191.
- Koffi, E. N.; Le Guernevé, C.; Lozano, P. R.; Meudec, E.; Adjé, F. A.; Bekro, Y.-A.; Lozano, Y. F., Polyphenol extraction and characterization of *Justicia secunda* Vahl leaves for traditional medicinal uses. *Industrial Crops and Products* 2013, 49, 682-689.
- Koffi, E.; Kassi, A. B. B.; Adje, F. A.; Lozano, Y. F.; Bekro, Y.-A., Effect of freeze-drying and spray-drying on total phenolics content and antioxidant activity from aqueous extract of *Justicia secunda* leaves. *Trends in Phytochemical Research* 2020, 4, (2), 69-76.
- Corrêa, G. M.; Alcântara, A. F. d. C., Chemical constituents and biological activities of species of *Justicia*: a review. *Revista Brasileira de farmacognosia* 2012, 22, 220-238.
